# Supplementary material
Source: PubMed Central journal article supplement (PMC3895430)
Supplement: cc-12-3421-s01.pdf [file cc-12-3421-s01.pdf]

## **Supplemental Material to:**

**Christoph Garbers, Fabian Kuck, Samadhi Aparicio-Siegmund, Kirstin Konzak, Mareike Kessenbrock, Annika Sommerfeld, Dieter Häussinger, Philipp A Lang, Dirk Brenner, Tak W Mak, Stefan Rose-John, Frank Essmann, Klaus Schulze-Osthoff, Roland P Piekorz, and Jürgen Scheller\***

**Cellular senescence or EGFR signaling induces Interleukin 6 (IL-6) receptor expression controlled by mammalian target of rapamycin (mTOR)**

**Cell Cycle 2013; 12(21)**

**<http://dx.doi.org/10.4161/cc.26431>**

**[www.landesbioscience.com/journals/cc/article/26431](http://www.landesbioscience.com/journals/cc/article/26431)**

# Supplemental Figure 1

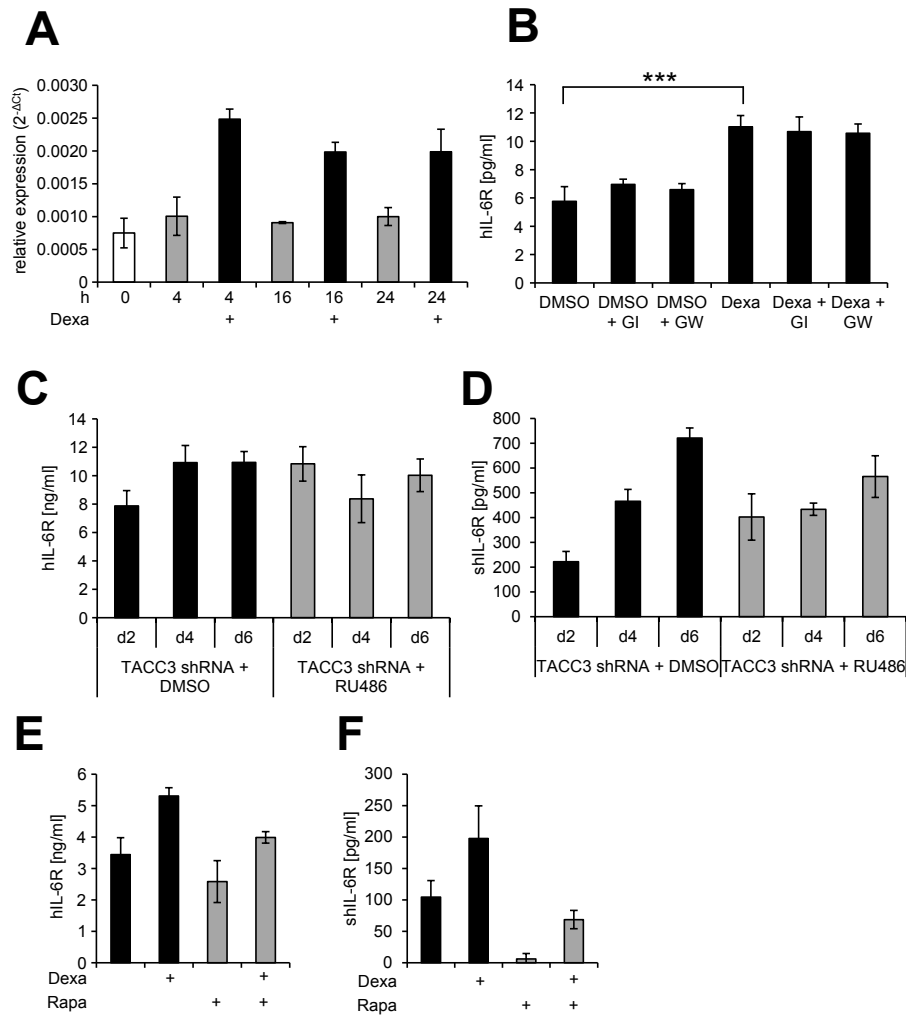

**Supp. Fig. 1: Activation of the glucocorticoid receptor causes IL-6R up-regulation independent of mTOR. (A)** MCF7 cells at day 0 in doxycycline-free medium. One day later, cells were stimulated with 1  $\mu$ M dexamethasone or DMSO as control. Cells were harvested at the indicated time points and the amounts of IL-6R mRNA determined as described under *Materials and Methods*. The results show the mean  $\pm$  s. d. of two independent experiments. **(B)** Cells were treated as described in Fig. 5C, and the amount of IL-6R in the cell lysate was measured via ELISA. The results show the mean  $\pm$  s. d. of three independent experiments. **(C, D)** MCF7 cells stably expressing a DOX-inducible shRNA targeting human TACC3 were seeded at day 0 in medium containing 5  $\mu$ g/ml doxycycline and either 5  $\mu$ M RU486 or the solvent DMSO. Medium was exchanged every two days and fresh DOX and 5  $\mu$ M RU486 or DMSO added. Cells were harvested at the indicated time points and the amount of IL-6R (C) in the cell lysate or (D) of soluble IL-6R in the supernatant was measured via ELISA. The results show the mean  $\pm$  s. d. of three independent experiments. **(E, F)** MCF7 cells were

seeded on day 0 and the medium was supplemented with either 500 ng/ml rapamycin or the DMSO solvent control. Cells were stimulated one day later with either 1  $\mu$ M dexamethasone or the solvent DMSO as control for 24 h. Cells were harvested at the indicated time points and the amount of IL-6R (E) in the cell lysate or (F) of soluble IL-6R in the supernatant was measured via ELISA. The results show the mean  $\pm$  s. d. of two independent experiments.
